# Supplementary material for: Effects of urban particulate matter on the secondary structure of albumin
Source: Royal Society of Chemistry journal article supplement (doi:10.1039/d4em00766b), 2025-01-01
Supplement: d4em00766b1.xlsx [file d4em00766b1.xlsx]

## Sheet: Shapiro-Wilk_F-test
helix	No PM	PMM 0.3 mg/ml	PMM 3 mg/ml	PMO 0.3 mg/ml	PMO 3 mg/ml		Shapiro-Wilk Test							Levene's Tests			Bartlett
Sample 1	87.8681	81.3732	79.7965	78.4762	79.8936
Sample 2	86.8862	79.7035	79.1664	77.7837	80.0044			No PM	PMM 0.3 mg/ml	PMM 3 mg/ml	PMO 0.3 mg/ml	PMO 3 mg/ml		type	p-value		0.0941213
Sample 3	85.2362	80.1972	77.9261	77.8465	79.8139		W-stat	0.978976	0.947264	0.965745	0.817321	0.991189		means	0.118725
							p-value	0.722096	0.557465	0.644471	0.156556	0.820462		medians	0.443691		p-value >0.05
							alpha	0.05	0.05	0.05	0.05	0.05		trimmed	0.118725		homogeneous variance
							normal	yes	yes	yes	yes	yes
							d'Agostino-Pearson
							DA-stat	#N/A	#N/A	#N/A	#N/A	#N/A
							p-value	#N/A	#N/A	#N/A	#N/A	#N/A
							alpha	0.05	0.05	0.05	0.05	0.05
							normal	#N/A	#N/A	#N/A	#N/A	#N/A
β-sheets	No PM	PMM 0.3 mg/ml	PMM 3 mg/ml	PMO 0.3 mg/ml	PMO 3 mg/ml		Shapiro-Wilk Test							Levene's Tests			Bartlett
Sample 1	7.92485	9.81865	9.58073	8.67129	8.77554
Sample 2	8.00489	10.325	9.27451	8.71408	8.8347			No PM	PMM 0.3 mg/ml	PMM 3 mg/ml	PMO 0.3 mg/ml	PMO 3 mg/ml		type	p-value		0.109342
Sample 3	8.32539	9.59756	9.04524	8.80964	8.86105		W-stat	0.892754	0.951236	0.993163	0.95374	0.953204		means	0.0857363
							p-value	0.362795	0.57475	0.841899	0.585989	0.583559		medians	0.450845		p-value >0.05
							alpha	0.05	0.05	0.05	0.05	0.05		trimmed	0.0857363		homogeneous variance
							normal	yes	yes	yes	yes	yes
							d'Agostino-Pearson
							DA-stat	#N/A	#N/A	#N/A	#N/A	#N/A
							p-value	#N/A	#N/A	#N/A	#N/A	#N/A
							alpha	0.05	0.05	0.05	0.05	0.05
							normal	#N/A	#N/A	#N/A	#N/A	#N/A
helix+β-sheets	No PM	PMM 0.3 mg/ml	PMM 3 mg/ml	PMO 0.3 mg/ml	PMO 3 mg/ml		Shapiro-Wilk Test							Levene's Tests			Bartlett
Sample 1	95.793	91.1919	89.3773	87.1475	88.6692
Sample 2	94.8911	90.0286	88.4409	86.4978	88.8392			No PM	PMM 0.3 mg/ml	PMM 3 mg/ml	PMO 0.3 mg/ml	PMO 3 mg/ml		type	p-value		0.085801
Sample 3	93.5616	89.7948	86.9714	86.6561	88.675		W-stat	0.987908	0.871421	0.983893	0.919423	0.775614		means	0.137256
							p-value	0.789554	0.299568	0.756955	0.450306	0.0575207		medians	0.419064		p-value >0.05
							alpha	0.05	0.05	0.05	0.05	0.05		trimmed	0.137256		homogeneous variance
							normal	yes	yes	yes	yes	yes
							d'Agostino-Pearson
							DA-stat	#N/A	#N/A	#N/A	#N/A	#N/A
							p-value	#N/A	#N/A	#N/A	#N/A	#N/A
							alpha	0.05	0.05	0.05	0.05	0.05
							normal	#N/A	#N/A	#N/A	#N/A	#N/A

## Sheet: ANOVA_Tukey
helix	No PM	PMM 0.3 mg/ml	PMM 3 mg/ml	PMO 0.3 mg/ml	PMO 3 mg/ml		ANOVA: Single Factor										TUKEY HSD/KRAMER			alpha	0.05
Sample 1	87.8681	81.3732	79.7965	78.4762	79.8936												group	mean	n	ss	df	q-crit
Sample 2	86.8862	79.7035	79.1664	77.7837	80.0044		DESCRIPTION					Alpha	0.05				No PM	86.6635	3	3.53798
Sample 3	85.2362	80.1972	77.9261	77.8465	79.8139		Group	Count	Sum	Mean	Variance	SS	Std Err	Lower	Upper		PMM 0.3 mg/ml	80.4247	3	1.47155
							No PM	3	259.99	86.6635	1.76899	3.53798	0.487594	85.5771	87.7499		PMM 3 mg/ml	78.963	3	1.81123
							PMM 0.3 mg/ml	3	241.274	80.4247	0.735774	1.47155	0.487594	79.3382	81.5111		PMO 0.3 mg/ml	78.0355	3	0.293378
							PMM 3 mg/ml	3	236.889	78.963	0.905616	1.81123	0.487594	77.8766	80.0495		PMO 3 mg/ml	79.904	3	0.0183087
							PMO 0.3 mg/ml	3	234.106	78.0355	0.146689	0.293378	0.487594	76.949	79.1219				15	7.13245	10	4.654
							PMO 3 mg/ml	3	239.712	79.904	0.00915433	0.0183087	0.487594	78.8176	80.9904		Q TEST
																	group 1	group 2	mean	std err	q-stat	lower	upper	p-value	mean-crit	Cohen d
							ANOVA										No PM	PMM 0.3 mg/ml	6.23882	0.487594	12.7951	3.96956	8.50809	3.02916e-05	2.26926	7.38726
							Sources	SS	df	MS	F	P value	Eta-sq	RMSSE	Omega Sq		No PM	PMM 3 mg/ml	7.70046	0.487594	15.7928	5.4312	9.96972	4.45492e-06	2.26926	9.11795
							Between Groups	139.024	4	34.7559	48.7293	1.59305e-06	0.9512	4.03027	0.927155		No PM	PMO 0.3 mg/ml	8.62801	0.487594	17.6951	6.35875	10.8973	1.53968e-06	2.26926	10.2162
							Within Groups	7.13245	10	0.713245	48.7293	1.59305e-06	3.47805				No PM	PMO 3 mg/ml	6.75948	0.487594	13.8629	4.49021	9.02874	1.47249e-05	2.26926	8.00376
							Total	146.156	14	10.4397							PMM 0.3 mg/ml	PMM 3 mg/ml	1.46164	0.487594	2.99765	-0.807625	3.7309	0.283613	2.26926	1.7307
																	PMM 0.3 mg/ml	PMO 0.3 mg/ml	2.38919	0.487594	4.89996	0.119927	4.65846	0.0381776	2.26926	2.82899
							Total	146.156	14								PMM 0.3 mg/ml	PMO 3 mg/ml	0.520658	0.487594	1.06781	-1.74861	2.78992	0.937832	2.26926	0.6165
																	PMM 3 mg/ml	PMO 0.3 mg/ml	0.927551	0.487594	1.9023	-1.34171	3.19682	0.672079	2.26926	1.09829
																	PMM 3 mg/ml	PMO 3 mg/ml	0.940982	0.487594	1.92985	-1.32828	3.21025	0.661119	2.26926	1.1142
																	PMO 0.3 mg/ml	PMO 3 mg/ml	1.86853	0.487594	3.83215	-0.400731	4.1378	0.121979	2.26926	2.21249
β-sheets	No PM	PMM 0.3 mg/ml	PMM 3 mg/ml	PMO 0.3 mg/ml	PMO 3 mg/ml		ANOVA: Single Factor										TUKEY HSD/KRAMER			alpha	0.05
Sample 1	7.92485	9.81865	9.58073	8.67129	8.77554												group	mean	n	ss	df	q-crit
Sample 2	8.00489	10.325	9.27451	8.71408	8.8347		DESCRIPTION					Alpha	0.05				No PM	8.08504	3	0.0898509
Sample 3	8.32539	9.59756	9.04524	8.80964	8.86105		Group	Count	Sum	Mean	Variance	SS	Std Err	Lower	Upper		PMM 0.3 mg/ml	9.91374	3	0.278164
							No PM	3	24.2551	8.08504	0.0449255	0.0898509	0.132445	7.78994	8.38015		PMM 3 mg/ml	9.30016	3	0.14436
							PMM 0.3 mg/ml	3	29.7412	9.91374	0.139082	0.278164	0.132445	9.61864	10.2088		PMO 0.3 mg/ml	8.73167	3	0.0100353
							PMM 3 mg/ml	3	27.9005	9.30016	0.0721802	0.14436	0.132445	9.00506	9.59526		PMO 3 mg/ml	8.82377	3	0.00383566
							PMO 0.3 mg/ml	3	26.195	8.73167	0.00501763	0.0100353	0.132445	8.43657	9.02678				15	0.526246	10	4.654
							PMO 3 mg/ml	3	26.4713	8.82377	0.00191783	0.00383566	0.132445	8.52866	9.11887		Q TEST
																	group 1	group 2	mean	std err	q-stat	lower	upper	p-value	mean-crit	Cohen d
							ANOVA										No PM	PMM 0.3 mg/ml	1.8287	0.132445	13.8073	1.2123	2.4451	1.52715e-05	0.616397	7.97164
							Sources	SS	df	MS	F	P value	Eta-sq	RMSSE	Omega Sq		No PM	PMM 3 mg/ml	1.21512	0.132445	9.17455	0.598721	1.83151	0.000519186	0.616397	5.29693
							Between Groups	5.58296	4	1.39574	26.5226	2.64133e-05	0.91386	2.97336	0.871894		No PM	PMO 0.3 mg/ml	0.646629	0.132445	4.88226	0.0302324	1.26303	0.0389266	0.616397	2.81878
							Within Groups	0.526246	10	0.0526246							No PM	PMO 3 mg/ml	0.738723	0.132445	5.57761	0.122327	1.35512	0.0182072	0.616397	3.22023
							Total	6.10921	14	0.436372							PMM 0.3 mg/ml	PMM 3 mg/ml	0.613582	0.132445	4.63275	-0.00281506	1.22998	0.0511965	0.616397	2.67472
																	PMM 0.3 mg/ml	PMO 0.3 mg/ml	1.18207	0.132445	8.92503	0.565674	1.79847	0.000648201	0.616397	5.15287
																	PMM 0.3 mg/ml	PMO 3 mg/ml	1.08998	0.132445	8.22968	0.47358	1.70637	0.00122716	0.616397	4.75141
																	PMM 3 mg/ml	PMO 0.3 mg/ml	0.568489	0.132445	4.29228	-0.0479077	1.18489	0.0743028	0.616397	2.47815
																	PMM 3 mg/ml	PMO 3 mg/ml	0.476395	0.132445	3.59694	-0.140002	1.09279	0.156178	0.616397	2.07669
																	PMO 0.3 mg/ml	PMO 3 mg/ml	0.0920942	0.132445	0.695342	-0.524302	0.708491	0.986379	0.616397	0.401456
helix+β-sheets	No PM	PMM 0.3 mg/ml	PMM 3 mg/ml	PMO 0.3 mg/ml	PMO 3 mg/ml		ANOVA: Single Factor										TUKEY HSD/KRAMER			alpha	0.05
Sample 1	95.793	91.1919	89.3773	87.1475	88.6692												group	mean	n	ss	df	q-crit
Sample 2	94.8911	90.0286	88.4409	86.4978	88.8392		DESCRIPTION					Alpha	0.05				No PM	94.7485	3	2.52009
Sample 3	93.5616	89.7948	86.9714	86.6561	88.675		Group	Count	Sum	Mean	Variance	SS	Std Err	Lower	Upper		PMM 0.3 mg/ml	90.3384	3	1.11998
							No PM	3	284.246	94.7485	1.26005	2.52009	0.477136	93.6854	95.8117		PMM 3 mg/ml	88.2632	3	2.94151
							PMM 0.3 mg/ml	3	271.015	90.3384	0.559988	1.11998	0.477136	89.2753	91.4015		PMO 0.3 mg/ml	86.7671	3	0.229566
							PMM 3 mg/ml	3	264.79	88.2632	1.47076	2.94151	0.477136	87.2001	89.3263		PMO 3 mg/ml	88.7278	3	0.0186252
							PMO 0.3 mg/ml	3	260.301	86.7671	0.114783	0.229566	0.477136	85.704	87.8303				15	6.82977	10	4.654
							PMO 3 mg/ml	3	266.183	88.7278	0.00931258	0.0186252	0.477136	87.6646	89.7909		Q TEST
																	group 1	group 2	mean	std err	q-stat	lower	upper	p-value	mean-crit	Cohen d
							ANOVA										No PM	PMM 0.3 mg/ml	4.41012	0.477136	9.24289	2.18953	6.63071	0.000488878	2.22059	5.33639
							Sources	SS	df	MS	F	P value	Eta-sq	RMSSE	Omega Sq		No PM	PMM 3 mg/ml	6.48534	0.477136	13.5922	4.26475	8.70594	1.76029e-05	2.22059	7.84747
							Between Groups	112.448	4	28.112	41.161	3.51683e-06	0.942741	3.7041	0.9146		No PM	PMO 0.3 mg/ml	7.98138	0.477136	16.7277	5.76079	10.202	2.60855e-06	2.22059	9.65773
							Within Groups	6.82977	10	0.682977							No PM	PMO 3 mg/ml	6.02076	0.477136	12.6185	3.80016	8.24135	3.42853e-05	2.22059	7.28531
							Total	119.278	14	8.51985							PMM 0.3 mg/ml	PMM 3 mg/ml	2.07522	0.477136	4.34932	-0.145372	4.29581	0.0698226	2.22059	2.51108
																	PMM 0.3 mg/ml	PMO 0.3 mg/ml	3.57126	0.477136	7.48478	1.35067	5.79185	0.00251255	2.22059	4.32134
																	PMM 0.3 mg/ml	PMO 3 mg/ml	1.61063	0.477136	3.37563	-0.609959	3.83123	0.195939	2.22059	1.94892
																	PMM 3 mg/ml	PMO 0.3 mg/ml	1.49604	0.477136	3.13546	-0.724552	3.71663	0.248579	2.22059	1.81026
																	PMM 3 mg/ml	PMO 3 mg/ml	0.464587	0.477136	0.973698	-1.75601	2.68518	0.954519	2.22059	0.562165
																	PMO 0.3 mg/ml	PMO 3 mg/ml	1.96063	0.477136	4.10915	-0.259965	4.18122	0.09064	2.22059	2.37242
